# Supplementary material for: Age-Related Changes in Corneal Deformation Dynamics Utilizing Scheimpflug Imaging
Source: PLoS One. 2015 Oct 13;10(10):e0140093. doi: 10.1371/journal.pone.0140093 (PMC4604157; doi:10.1371/journal.pone.0140093)
Supplement: S1 Raw Data — (XLSX) [file pone.0140093.s001.xlsx]

## Sheet: a6(t)
	Young Group, 10 % of data trimming										Older Group, 10 % of data trimming
	Patient ID	mA1	mA2	mA3	mA4	mP1	mP2	mP3	mP4		Patient ID	mA1	mA2	mA3	mA4	mP1	mP2	mP3	mP4
	1	-0.000522132	-0.106269	0.137089	-0.000670851	0.000284693	-0.109403	0.144373	8.14285e-05		1	-0.00124332	-0.124088	0.151201	-0.00159676	1.53804e-05	-0.103812	0.146119	0.00086785
	2	-0.00148219	-0.0996581	0.141661	-0.000543644	-0.00268317	-0.139407	0.146723	0.00183325		2	-6.07969e-05	-0.107448	0.148391	-0.000231927	-0.00120825	-0.125238	0.146651	-0.00244402
	3	0.000314218	-0.126112	0.148356	-0.000970671	-0.00198096	-0.165055	0.293977	-0.00949419		3	-0.00158599	-0.117359	0.163491	0.000850659	-0.00113306	-0.101281	0.133221	0.00150534
	4	0.000284121	-0.127724	0.156504	-0.000148566	-0.000111037	-0.12487	0.151485	0.00477357		4	-9.06747e-05	-0.121127	0.154402	-0.00124869	-0.00230703	-0.110965	0.129482	-0.0037626
	5	-0.000598617	-0.150322	0.165193	0.00125899	-0.00138515	-0.124148	0.144141	0.00059411		5	-0.00116427	-0.0981248	0.139848	-0.00148623	-0.00250179	-0.111668	0.141838	0.00382841
	6	-0.000694151	-0.127173	0.189812	0.00420981	0.000947376	-0.0911975	0.0990981	-0.00535004		6	-0.000579224	-0.159016	0.279861	-0.0114418	-0.000542108	-0.155822	0.137586	-0.00295044
	7	-0.00114874	-0.125857	0.1637	0.00254283	-0.00124014	-0.091708	0.146881	-0.00206181		7	-0.000500115	-0.0840035	0.121878	0.00165178	-0.00210671	-0.0515909	0.0648428	0.00883822
	8	-0.00163945	-0.139823	0.161625	0.0013131	-0.000486703	-0.122556	0.154508	0.00239176		8	-0.000533844	-0.0997332	0.139429	0.000556107	-0.000923138	-0.104273	0.147137	-0.00149702
	9	-0.00115766	-0.117613	0.170937	0.00254935	-0.000969321	-0.108578	0.155886	-0.00205474		9	-0.000936078	-0.0869562	0.213932	-0.0102243	-0.000484476	-0.0803378	0.0305338	0.01114
	10	0.000361864	-0.133223	0.149591	-0.00109195	0.000583322	-0.115997	0.137125	-0.00244954		10	-8.72773e-05	-0.164692	0.19347	0.00578277	-0.00602182	-0.0944854	0.0682436	-0.00323729
	11	-0.000967747	-0.131973	0.155996	0.00179681	-0.00220879	-0.124938	0.155649	-0.000528844		11	0.00959954	-0.147381	0.172918	0.00812957	0.010298	-0.0641419	0.142619	0.000451345
	12	-0.00082785	-0.131461	0.180694	0.00262725	0.00250719	-0.113773	0.17702	0.00160706		12	0.00320003	-0.129386	0.442826	-0.000661268	-0.0100973	-0.0739179	0.292686	-0.00468099
	13	-0.00174029	-0.101436	0.147713	0.00325582	-0.00151115	-0.0907757	0.141687	0.0151755		13	0.000171863	-0.126387	0.156151	-0.00911918	0.00859991	-0.01846	0.0685943	-0.00605161
	14	-0.000421711	-0.142873	0.168985	-0.00173483	-0.000751419	-0.139588	0.13566	-0.00074402		14	-0.000495263	-0.11673	0.160103	0.00312616	-0.000169516	-0.097687	0.139131	-0.00158623
	15	-0.000802796	-0.107673	0.14845	-0.00352838	0.00986012	-0.101517	0.0319573	-0.0207961		15	-0.000796093	-0.124466	0.161867	-6.87079e-05	-0.000694758	-0.138023	0.0795655	0.00993487
	16	-0.000193218	-0.103009	0.144164	-0.000919445	-0.00322786	-0.0920061	0.14119	-0.000689225		16	-0.00109744	-0.161741	0.150819	-0.00929641	-0.000825124	-0.14817	0.0647176	0.00742172
	17	-0.000369991	-0.0974461	0.15925	3.42985e-07	3.62349e-05	-0.0916639	0.1479	-0.000906192		17	0.000293531	-0.109801	0.166073	-0.000633733	-0.000833942	-0.0989688	0.216355	-0.00721566
	18	-0.00105542	-0.105249	0.17257	0.00138599	-0.00135052	-0.102328	0.14151	-5.536e-05		18	0.000171863	-0.126387	0.156151	-0.00911918	0.00859991	-0.01846	0.0685943	-0.00605161
	19	-0.000739827	-0.130577	0.158817	0.00179206	0.000737555	-0.127397	0.146332	-0.00499617		19	-0.00155549	-0.118911	0.166336	0.000422172	0.00133832	-0.109871	0.144769	-0.000508536
	20	-0.000556328	-0.0828481	0.189539	-0.00724562	-0.000758602	-0.0911106	0.277089	-0.00221789		20	-0.00158916	-0.0994974	0.114419	0.00102774	-0.000591612	-0.108005	0.156667	0.000227524
	21	0.00326324	-0.149789	0.143244	0.000425609	0.00316218	-0.129072	0.150466	0.00363711		21	-0.00114281	-0.114133	0.149865	0.000607176	-0.00352468	-0.143121	0.0634712	-0.0221486
	22	-0.000805848	-0.132734	0.153641	0.00389205	-0.00087309	-0.11186	0.143515	-0.00491797		22	-0.00251626	-0.148692	0.155979	0.00349876	0.00014243	-0.115775	0.14762	-0.00383304
	23	-6.8822e-05	-0.120572	0.161152	0.000338289	-0.00029377	-0.104007	0.154066	0.000289292		23	-0.00109071	-0.0926607	0.160986	0.00152454	-0.00784803	0.00711505	0.051088	0.00236458
	24	0.000155713	-0.131823	0.145499	-0.00097597	-0.00213065	-0.105873	0.139175	-6.688e-05		24	-0.00113544	-0.078277	0.134571	-0.000481876	-0.00280317	-0.0592082	-0.00556392	0.00737703
	25	-0.000563254	-0.105373	0.150242	0.00191576	-0.001472	-0.0893084	0.138329	0.002273		25	-0.000943653	-0.126	0.126751	0.00164075	0.000581113	-0.119624	0.129063	0.000837383

## Sheet: a4(t)
	Young Group, 10 % of data trimming										Older Group, 10 % of data trimming
	Patient ID	mA1	mA2	mA3	mA4	mP1	mP2	mP3	mP4		Patient ID	mA1	mA2	mA3	mA4	mP1	mP2	mP3	mP4
	1	3.91793e-05	-0.0942767	0.142013	-0.00160035	-0.000304543	-0.0922199	0.150428	0.000509632		1	-0.00115582	-0.113814	0.159216	-0.000253487	-0.000232802	-0.0938979	0.0937108	0.0102291
	2	-9.22221e-05	-0.0795895	0.183411	-0.00718904	2.31748e-05	-0.0905031	0.274685	-0.0028242		2	-0.000212038	-0.0977893	0.138028	0.000281843	-0.000547125	-0.0900321	0.159427	-0.00460137
	3	-0.00125231	-0.119287	0.156687	0.00257509	-0.00141717	-0.104194	0.133876	0.00211925		3	-0.000699532	-0.117235	0.163203	-3.88183e-05	0.00171008	-0.104296	0.148618	-0.00177415
	4	-0.00147777	-0.0951485	-0.00147777	-0.000777811	-0.00147777	-0.13463	-0.00147777	0.00189211		4	-0.000148143	-0.118319	-0.000148143	-0.0017449	-0.000148143	-0.11676	-0.000148143	-0.00340566
	5	-4.61629e-05	-0.138561	0.157533	0.0029181	0.000508465	-0.119837	0.141413	0.00171227		5	-0.000569726	-0.0840488	0.138159	-0.00162364	-0.00257359	-0.108734	0.142305	0.00230558
	6	0.000563145	-0.115646	0.172578	0.000115389	-0.0010071	-0.085451	0.141556	-0.0020926		6	-0.000492607	-0.157144	0.225255	-0.0152982	-0.000477895	-0.152923	0.132384	-0.000341738
	7	-0.00133454	-0.109922	0.155323	0.00239488	-0.000949204	-0.110057	0.129237	-0.000764567		7	-0.00319273	-0.138861	0.144643	0.00214977	0.00574884	-0.167764	0.0877939	-0.00191515
	8	-0.00155621	-0.13649	0.158098	0.000843982	-0.000565146	-0.120527	0.150892	0.00201068		8	0.000676134	-0.105028	0.144431	-0.00034213	-0.00163276	-0.112966	0.154202	0.000814182
	9	-0.00106104	-0.115319	0.1687	0.00222852	-0.000928815	-0.102132	0.153086	-0.00191648		9	-0.000985687	-0.0824955	0.200623	-0.00904412	-0.00031979	-0.0794987	0.128431	0.00967483
	10	-0.000299782	-0.149754	0.152411	0.00276677	0.000214988	-0.114928	0.129738	-0.000392802		10	0.000232329	-0.151125	0.187543	0.00245426	-0.00600758	-0.0960772	0.0726136	-0.00211975
	11	-0.00064452	-0.128053	0.156072	0.00139722	0.000474833	-0.126862	0.144375	-0.00454654		11	0.00977774	-0.137909	0.239584	0.00610391	0.00963306	-0.0623299	0.147149	0.0056963
	12	-0.000722108	-0.128188	0.177318	0.00236176	0.00228264	-0.111884	0.173352	0.00184067		12	0.00577645	-0.140304	0.274001	-0.00948374	0.00365448	-0.0755995	0.146385	-0.0115731
	13	-0.000675611	-0.106274	0.144449	-0.00317613	0.00331832	-0.0994997	0.0363457	-0.0270345		13	0.000873947	-0.119096	0.160095	-0.00261488	-0.000341118	-0.020778	0.0170377	-0.169434
	14	-0.000366276	-0.139311	0.165045	-0.00207406	-0.000780956	-0.137466	0.133468	-0.00112781		14	0.000262578	-0.108211	0.163391	-0.000842752	-0.00205313	-0.0965203	0.0492678	-0.00406361
	15	-0.000249827	-0.111433	0.146901	-0.00169438	-0.000911847	-0.121453	0.161223	-0.0200599		15	-0.00113614	-0.142871	0.159575	-0.000229971	-0.00045743	-0.135127	0.0805411	0.0093216
	16	-0.000138685	-0.0998386	0.148108	0.00234457	-0.00289438	-0.0886828	0.137282	-0.000798191		16	-0.00104341	-0.15915	0.156098	-0.00653293	-0.000813403	-0.145187	0.0681718	0.00701687
	17	-0.00103343	-0.10312	0.147756	-0.00202438	-0.00140891	-0.100067	0.138004	-0.000139097		17	-0.00103989	-0.108211	0.15627	0.0027193	0.00157137	-0.0850884	0.136168	-0.000931492
	18	-0.000304527	-0.0916174	0.144613	0.000431361	-2.95088e-05	-0.0895974	0.13559	-0.000515662		18	0.000923469	-0.119722	0.163384	-0.00294338	-0.000689803	-0.0204472	0.0179609	-0.239049
	19	-0.000893037	-0.128427	0.153398	0.00132008	-0.00200774	-0.123921	0.153235	-0.000405633		19	-0.00194176	-0.115188	0.16149	0.000352697	0.000907265	-0.0911664	0.132254	0.00112736
	20	-0.000613684	-0.0981892	0.139691	-0.00143056	-0.000718252	-0.106276	0.142785	0.0010381		20	-0.00131115	-0.0980516	0.114175	0.000676949	-0.000289839	-0.104134	0.143802	0.00107108
	21	0.00358419	-0.14802	0.138978	0.000259782	0.00023122	-0.125804	0.147681	0.00165941		21	-0.00145548	-0.103535	0.140032	0.000427693	0.000138548	-0.113159	0.0354745	0.00215911
	22	-0.000741335	-0.130358	0.151411	0.00331152	-0.000855268	-0.109854	0.141196	-0.00438107		22	-0.00238363	-0.139049	0.154746	0.00240874	-0.000432207	-0.107314	0.142489	-0.0036593
	23	-1.82562e-05	-0.11744	0.15754	-3.70505e-07	-0.000294137	-0.0967493	0.150489	0.000119131		23	-0.00134492	-0.0903701	0.146157	0.00155538	-0.00483744	-0.0382492	0.0311642	0.000781311
	24	-0.000129995	-0.128343	0.14234	-0.00123388	-0.00175828	-0.105687	0.138282	-0.000577016		24	-0.000803833	-0.0748696	0.125667	-0.000286679	-0.00825806	-0.0532672	-0.000133584	0.0172439
	25	-0.000506102	-0.0985055	0.148085	0.00158326	-0.00110241	-0.0777478	0.136899	0.00220442		25	-0.00109995	-0.121755	0.123092	0.00129628	-0.000196467	-0.132037	0.12619	0.000827121

## Sheet: a2(t)
	Young Group, 10 % of data trimming										Older Group, 10 % of data trimming
	Patient ID	mA1	mA2	mA3	mA4	mP1	mP2	mP3	mP4		Patient ID	mA1	mA2	mA3	mA4	mP1	mP2	mP3	mP4
	1	1.57488e-06	-0.100399	0.172945	0.00136704	-0.000367028	-0.100076	0.161271	0.00117866		1	-0.00183412	-0.146886	0.170646	0.000291562	-0.000325209	-0.120454	0.0307092	-6.89061e-05
	2	0.000363057	-0.0763151	0.220495	-0.0110969	0.000189472	-0.102083	0.269216	-0.00613295		2	-0.000234163	-0.104979	0.138172	0.00157865	-0.000513583	-0.10454	0.18016	-0.0134126
	3	-0.00148146	-0.134513	0.156976	-0.000296089	-0.00178513	-0.120516	0.132215	-0.000812778		3	-0.0013021	-0.149001	0.175108	0.000415253	0.00284724	-0.123009	0.167709	-0.00306139
	4	-0.00171591	-0.105289	-0.00171591	-0.00120932	-0.00171591	-0.148223	-0.00171591	0.00267675		4	-0.000193141	-0.124361	-0.000193141	-0.00131373	-0.000193141	-0.138909	-0.000193141	-0.00217737
	5	0.000174152	-0.15022	0.18221	-0.000758926	0.000804644	-0.138007	0.166189	0.00312502		5	-0.000851663	-0.10885	0.156298	-0.00212059	-0.00298674	-0.128335	0.172446	0.00257282
	6	0.00089604	-0.131266	0.19072	0.00032913	-0.00118001	-0.0894604	0.150671	-0.00201863		6	0.000126117	-0.141171	0.282449	-0.0240471	-0.000530034	-0.165485	0.125958	0.000481026
	7	-0.00184124	-0.141399	0.170747	0.00199466	-0.000596043	-0.10475	0.163987	0.00102879		7	-0.00319273	-0.138861	0.144643	0.00214977	0.00574884	-0.167764	0.0877939	-0.00191515
	8	-0.0018563	-0.146589	0.195513	0.00064609	-0.000372258	-0.128049	0.187386	0.00190119		8	0.000992893	-0.117276	0.150183	-0.000531163	-0.0020468	-0.136717	0.175819	-0.00158352
	9	-0.0011263	-0.122852	0.17672	0.00256206	-0.00109472	-0.113285	0.160826	-0.00203831		9	-0.00110738	-0.0916233	0.297178	-0.0235391	-0.000389904	-0.0843394	0.0046039	0.0277792
	10	-0.000355127	-0.178449	0.161568	-0.000277682	0.000599273	-0.117314	0.132343	-0.00158453		10	0.000713966	-0.184217	0.216613	0.00546009	-0.00745734	-0.0900839	0.061238	-0.00249765
	11	-0.000700335	-0.138884	0.16851	0.00193223	0.00112534	-0.131428	0.152208	-0.00600828		11	0.0157495	-0.165901	0.174234	0.00807329	0.0120241	-0.0430668	0.174835	0.0051304
	12	-0.000898533	-0.14938	0.222482	0.000973945	0.00336492	-0.145064	0.187646	0.00163751		12	0.0103656	-0.178273	0.256809	-0.00645377	0.00396908	-0.0770799	0.170879	-0.0136425
	13	-0.00119431	-0.133187	0.178294	-0.00079428	0.00275418	-0.0730155	0.0275904	-0.0116814		13	0.000873947	-0.119096	0.160095	-0.00261488	-0.000341118	-0.020778	0.0170377	-0.169434
	14	-0.00033629	-0.153394	0.185987	-6.63277e-05	-0.000638819	-0.154793	0.131799	-0.0032364		14	0.000481501	-0.114304	0.173267	-0.000207383	-0.00222172	-0.105794	0.0566475	-0.0082491
	15	-0.000223678	-0.130134	0.178982	0.00306569	-0.00065171	-0.117009	0.179502	-0.029494		15	-0.00117828	-0.162343	0.171644	-0.00139834	-0.000433301	-0.157827	0.031324	-0.00230921
	16	-0.000207554	-0.12164	0.155032	-0.0012297	-0.00407281	-0.0962347	0.174386	0.0018385		16	-0.000668936	-0.14317	0.200821	-0.0157187	-0.00091261	-0.158004	0.0682716	0.0102425
	17	-0.00124085	-0.109601	0.178923	0.00104021	-0.00143265	-0.109503	0.164947	-0.0015092		17	-0.00122689	-0.11939	0.156532	-7.30816e-05	0.00213467	-0.0957469	0.160146	-0.00203032
	18	-0.000250821	-0.0963411	0.167692	-0.000449376	0.000284648	-0.0868599	0.160424	-0.00166477		18	0.00129898	-0.136224	0.181887	-0.00335863	-0.0013065	-0.0199229	0.0212469	-0.28455
	19	-0.00102558	-0.150582	0.164488	0.00202578	-0.0027389	-0.12754	0.163491	-0.000964763		19	-0.00231463	-0.121105	0.174403	0.00118238	0.00128956	-0.10213	0.144841	0.00118737
	20	-0.000714652	-0.109582	0.159454	-0.00250395	-0.000642163	-0.120687	0.172243	7.81383e-05		20	-0.00150069	-0.104533	0.158006	-0.00137191	-8.61178e-05	-0.119906	0.172575	0.0013771
	21	0.00406534	-0.165756	0.152555	0.00166131	0.000231653	-0.131161	0.18149	0.0012606		21	-0.00157316	-0.1042	0.141679	0.0021017	0.000517665	-0.116903	0.0409258	0.000937259
	22	-0.000741335	-0.130358	0.151411	0.00331152	-0.000855268	-0.109854	0.141196	-0.00438107		22	-0.00307025	-0.172536	0.164366	-0.000362735	-0.000568794	-0.121779	0.156345	-0.00412539
	23	-0.000136988	-0.136171	0.170782	0.00178365	-0.000390169	-0.121697	0.180905	0.000569133		23	-0.00147332	-0.0987251	0.167864	0.00110775	-0.00659928	-0.0340428	0.0325314	0.00171481
	24	-0.000131222	-0.149741	0.17853	0.00195949	-0.00200204	-0.120126	0.171448	0.00243582		24	-0.000824359	-0.0789078	0.123931	0.000877116	-0.00661042	-0.0765006	0.00144203	0.0177061
	25	-0.000532176	-0.112597	0.15543	0.00277057	-0.00139275	-0.0852839	0.133706	-0.000334431		25	-0.00115781	-0.136943	0.146198	0.00214017	-3.5266e-05	-0.152529	0.151694	0.00195705
